# Supplementary material for: Biodegradation of DDT by Stenotrophomonas sp. DDT-1: Characterization and genome functional analysis
Source: PubMed Central journal article supplement (PMC4758049; doi:10.1038/srep21332), 2016-02-18
Supplement: srep21332-s1.pdf [file srep21332-s1.pdf]

## **Biodegradation of DDT by *Stenotrophomonas* sp. DDT-1: Characterization and genome functional analysis**

Xiong Pan<sup>1</sup>, Dunli Lin<sup>1</sup>, Yuan Zheng<sup>1</sup>, Qian Zhang<sup>1</sup>, Yuanming Yin<sup>1</sup>, Lin Cai<sup>2</sup>, Hua Fang<sup>1,\*</sup> & Yunlong Yu<sup>1,\*</sup>

**Extraction and determination of DDT metabolites.** After incubation for 14 d under conditions of 30 °C and 150 rpm, the metabolites DDD, DDE, DDMS, and DDOH in MSM were extracted according to the method described by Fang et al.<sup>1</sup>, which was the same extraction method with parent compound DDT. For the extraction of the metabolite DDA, the culture was firstly adjusted to pH 1-2 by 1 mol/l HCl, and then was extracted three times with 50, 40, and 30 ml ethyl acetate, respectively. The organic phase was dried through anhydrous sodium sulfate and collected in a 250-mL flat-bottom flask. It was subsequently concentrated to about 1 ml on a vacuum rotary evaporator and immediately concentrated to almost dryness under a gentle nitrogen flow. *n*-Hexane was added to dissolve DDA and the volume was made up to 10 ml and was filtered through a 0.22 µm syringe filter membrane. DDT metabolites were determined using a GC-MS-QP2010 Plus equipped with electron impact (EI) ionization (Shimadzu Corporation, Kyoto, Japan) and a VF-1701MS silica capillary column (30 m × 0.25 mm × 0.25 µm, Agilent Technologies, USA)<sup>1</sup>. The extraction and determination methods of DDT metabolites DDD, DDE, DDMS, DDOH, and DDA have been added in revised manuscript (please see lines 317-323 and Supplementary Information).

Reference:

1. Fang, H., Dong, B., Yan, H., Tang, F. F. & Yu, Y. L. Characterization of a bacterial strain

capable of degrading DDT congeners and its use in bioremediation of contaminated soil. *J. Hazard. Mater.* **184**, 281-289 (2010).

**Buffer preparation.** The medium was prepared with pH 5.0 buffer (KHP, 10.21 g; NaOH, 0.09 g; H<sub>2</sub>O, 1000 ml), pH 7.0 buffer (MSM), and pH 9.0 buffer (KCl, 3.73 g; H<sub>3</sub>BO<sub>3</sub>, 0.93 g; NaOH, 0.83 g; H<sub>2</sub>O, 1000 ml), respectively.

**Statistical analysis.** Mean and standard deviations of all data were processed using Microsoft Excel 2010 (Microsoft, Redmond, Washington, USA). The difference of DDT degradation by the isolate DDT-1 in MSM at different substrate concentration, pH, and temperature were analyzed by one-way ANOVA using SPSS version 15.0 (SPSS Inc., Chicago, Illinois, USA).

**Inoculum preparation.** The isolate DDT-1 was cultured in 250 ml Erlenmeyer flasks containing 150 ml LB medium (beef extract, 10 g; peptone, 5 g; sodium chloride, 5 g; distilled water, 1000 ml; pH 7.0) supplemented with DDT of 1 mg/l at 30 °C and 150 rpm on a rotary shaker. At the exponential phase, the microorganisms were harvested by centrifugation (8000×g, 10 min). The bacterial sediment was washed three times with 20 ml of NaH<sub>2</sub>PO<sub>4</sub>-Na<sub>2</sub>HPO<sub>4</sub> buffer (0.1 mol/l, pH 7.0), and then suspended in the same buffer and used to inoculate the degradation cultures.

## Figure captions

**Fig. S1** Growth curve of the strain DDT-1 in mineral salts medium (pH 7.0) supplemented with 1.0 mg/l of DDT at 30 °C.

## Tables

**Table S1** 16S rDNA sequence of the isolate DDT-1

**Table S2** Functional annotation of strain DDT-6 genome against the Clusters of Orthologous Groups (COG) database

**Table S3** Functional classification of strain DDT-6 genome against Gene Ontology (GO) database

**Table S4** Metabolic annotation of strain DDT-6 genome against Kyoto Encyclopedia of Genes and Genomes (KEGG) pathway database

**Table S5** Information on the assembled contigs from clean reads by SOAPdenovo

**Table S6** DDGs-like genes found in strain DDT-1 genome using BLASTx

**Table S7** Molecular weight and characteristic peak of DDT and its metabolites

**Table S8** Composition of DDT degradation genes (DDGs) database

Fig. S1

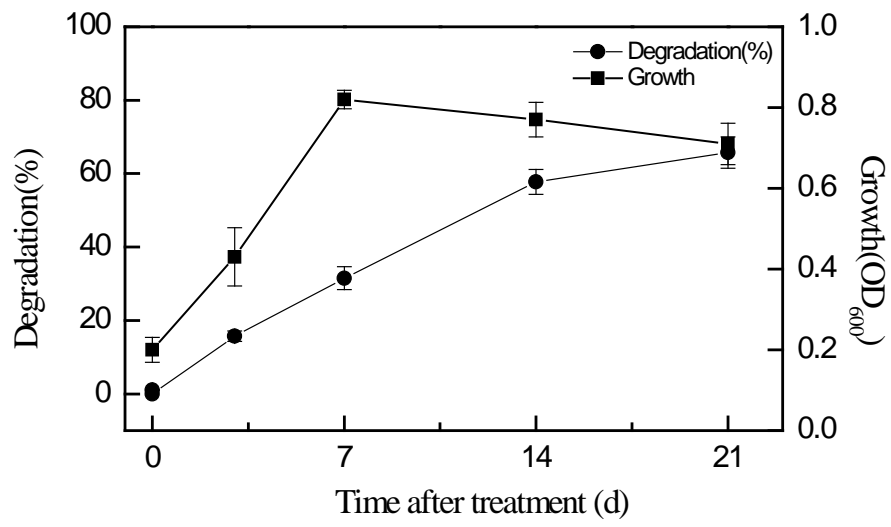

**Table S1** 16S rDNA sequence of the isolate DDT-1

|                        |                                                                                                                                                                                                                                                                                                                                                                                                                                                                                                                                                                                                                                                                                                                                                                                                                                                                                                                                                                                                                                                                                                                                                                                                                                                                                                                                                                                                                                                                                                                                                                                                                     |
|------------------------|---------------------------------------------------------------------------------------------------------------------------------------------------------------------------------------------------------------------------------------------------------------------------------------------------------------------------------------------------------------------------------------------------------------------------------------------------------------------------------------------------------------------------------------------------------------------------------------------------------------------------------------------------------------------------------------------------------------------------------------------------------------------------------------------------------------------------------------------------------------------------------------------------------------------------------------------------------------------------------------------------------------------------------------------------------------------------------------------------------------------------------------------------------------------------------------------------------------------------------------------------------------------------------------------------------------------------------------------------------------------------------------------------------------------------------------------------------------------------------------------------------------------------------------------------------------------------------------------------------------------|
| 16S rDNA size (bp)     | 1422                                                                                                                                                                                                                                                                                                                                                                                                                                                                                                                                                                                                                                                                                                                                                                                                                                                                                                                                                                                                                                                                                                                                                                                                                                                                                                                                                                                                                                                                                                                                                                                                                |
| Similarity             | 99%                                                                                                                                                                                                                                                                                                                                                                                                                                                                                                                                                                                                                                                                                                                                                                                                                                                                                                                                                                                                                                                                                                                                                                                                                                                                                                                                                                                                                                                                                                                                                                                                                 |
| Accession number       | KP729429                                                                                                                                                                                                                                                                                                                                                                                                                                                                                                                                                                                                                                                                                                                                                                                                                                                                                                                                                                                                                                                                                                                                                                                                                                                                                                                                                                                                                                                                                                                                                                                                            |
| Putive genus           | <i>Stenotrophomonas</i>                                                                                                                                                                                                                                                                                                                                                                                                                                                                                                                                                                                                                                                                                                                                                                                                                                                                                                                                                                                                                                                                                                                                                                                                                                                                                                                                                                                                                                                                                                                                                                                             |
| 16S rDNA sequence (bp) | <p>GGCAGCGCCCTCCCGAAGGTTAAGCTACCTGCTTCTGGTGCAACAAACTCCCATGGTG<br/> TGACGGGCGGTGTGTACAAGGCCCGGAACGTATCACCGCAGCAATGCTGATCTGC<br/> GATTACTAGCGATTCCGACTTCATGGAGTCGAGTTGCAGACTCCAATCCGACTGAG<br/> ATAGGGTTTCTGGGATTGGCTTACCGTCGCCGGCTTGCAGCCCTCTGTCCCTACCATT<br/> GTAGTACGTGTGTAGCCCTGGCCGTAAGGGCCATGATGACTTGACGTCATCCCCACCT<br/> TCCTCCGGTTTGTACCGGCGGTCTCCTTAGAGTTCACCATTACGTGCTGGCAACT<br/> AAGGACAAGGGTTGCGCTCGTTGCGGGACTTAACCCAACATCTCACGACACGAGCTG<br/> ACGACAGCCATGCAGCACCTGTGTTTCGAGTTCCCGAAGGCACCCATCCATCTCTGGA<br/> AAGTTCTCGACATGTCAAGGCCAGGTAAGGTTCTTCGCGTTGCATCGAATTAACCAC<br/> ATACTCCACCGCTTGTGCGGGCCCCGTCAATTCCTTTGAGTTTCAGTCTTGCGACCGT<br/> ACTCCCAAGGCGGCGAACTTAACGCGTTAGCTTCGATACTGCGTGCCAAATTGCACCC<br/> AACATCCAGTTCGCATCGTTTAGGGCGTGGACTACCAGGGTATCTAATCCTGTTTGCT<br/> CCCCACGCTTTCGTGCCTCAGTGCAATGTTGGTCCAGGTAGCTGCCTTCGCCATGGA<br/> TGTTCTCCTGATCTCTACGCATTTCACTGCTACACCAGGAATTCCGCTACCCTCTACC<br/> ACATTCTAGTCGTCCAGTATCCACTGCAGTTCACAGGTTGAGCCCAGGGCTTTCACAA<br/> CGGACTTAAATGACCACCTACGCACGCTTTACGCCAGTAATTCCGAGTAACGCTTGC<br/> ACCCTTCGTATTACCGCGGCTGCTGGCACGAAGTTAGCCGGTGCTTATTCTTTGGGTA<br/> CCGTCATCCCAACCAGGTATTAGCCGGCTGGATTTCTTTCCCAACAAAAGGGCTTAC<br/> AACCCGAAGGCCTTCTTACCCACGCGGTATGGCTGGATCAGGCTTGCGCCATTGTC<br/> CAATATCCCCACTGCTGCCTCCCGTAGGAGTCTGGACCGTGTCTCAGTTCAGTGTG<br/> GCTGATCATCCTCTCAGACCAGCTACGGATCGTCGCCTTGGTGGGCTTTACCCCGCC<br/> AACTAGCTAATCCGACATCGGCTCATTCAATCGCGCAAGGCCCGAAGATCCCCTGCTT<br/> TCACCCGTAGGTCGTATGCGGTATTAGCGTAAGTTCCCTACGTTATCCCCACGACA<br/> GAGTAGATTCCGATGTATTCTCACCCGTCCGCCACTCGCCACCCAGAGAGCAAGCTC<br/> TCCTGTGCTGCCGTTTCGACttGCATGtGttAG</p> |

**Table S2** Functional annotation of strain DDT-6 genome against the Clusters of Orthologous Groups (COG) database

| <b>No.</b> | <b>Class description</b>                                      | <b>Gene number</b> |
|------------|---------------------------------------------------------------|--------------------|
| A          | RNA processing and modification                               | 1                  |
| B          | Chromatin structure and dynamics                              | 1                  |
| C          | Energy production and conversion                              | 178                |
| D          | Cell cycle control, cell division, chromosome partitioning    | 28                 |
| E          | Amino acid transport and metabolism                           | 218                |
| F          | Nucleotide transport and metabolism                           | 56                 |
| G          | Carbohydrate transport and metabolism                         | 131                |
| H          | Coenzyme transport and metabolism                             | 104                |
| I          | Lipid transport and metabolism                                | 107                |
| J          | Translation, ribosomal structure and biogenesis               | 167                |
| K          | Transcription                                                 | 203                |
| L          | Replication, recombination and repair                         | 111                |
| M          | Cell wall/membrane/envelope biogenesis                        | 158                |
| N          | Cell motility                                                 | 89                 |
| O          | Posttranslational modification, protein turnover, chaperones  | 124                |
| P          | Inorganic ion transport and metabolism                        | 168                |
| Q          | Secondary metabolites biosynthesis, transport and catabolism  | 72                 |
| R          | General function prediction only                              | 360                |
| S          | Function unknown                                              | 242                |
| T          | Signal transduction mechanisms                                | 147                |
| U          | Intracellular trafficking, secretion, and vesicular transport | 100                |
| V          | Defense mechanisms                                            | 42                 |

**Table S3** Functional classification of strain DDT-6 genome against Gene Ontology (GO) database

| <b>Ontology</b>    | <b>Class</b>                                       | <b>Number</b> |
|--------------------|----------------------------------------------------|---------------|
| biological process | biological adhesion                                | 10            |
| Biological process | biological regulation                              | 428           |
| Biological process | cellular component organization or biogenesis      | 113           |
| Biological process | cellular process                                   | 1513          |
| Biological process | death                                              | 2             |
| Biological process | developmental process                              | 26            |
| Biological process | establishment of localization                      | 410           |
| Biological process | localization                                       | 435           |
| Biological process | locomotion                                         | 43            |
| Biological process | metabolic process                                  | 1560          |
| Biological process | multi-organism process                             | 14            |
| Biological process | multicellular organismal process                   | 2             |
| Biological process | negative regulation of biological process          | 9             |
| Biological process | nitrogen utilization                               | 2             |
| Biological process | positive regulation of biological process          | 4             |
| Biological process | regulation of biological process                   | 419           |
| Biological process | reproduction                                       | 9             |
| Biological process | reproductive process                               | 4             |
| Biological process | response to stimulus                               | 292           |
| Biological process | signaling                                          | 175           |
| Biological process | viral reproduction                                 | 4             |
| Cellular component | cell                                               | 1448          |
| Cellular component | cell part                                          | 1447          |
| Cellular component | macromolecular complex                             | 126           |
| Cellular component | organelle                                          | 117           |
| Cellular component | organelle part                                     | 35            |
| Cellular component | virion                                             | 3             |
| Cellular component | virion part                                        | 3             |
| Molecular function | antioxidant activity                               | 28            |
| Molecular_function | binding                                            | 1178          |
| Molecular function | catalytic activity                                 | 1582          |
| Molecular function | enzyme regulator activity                          | 4             |
| Molecular function | molecular transducer activity                      | 214           |
| Molecular function | nucleic acid binding transcription factor activity | 153           |
| Molecular function | protein binding transcription factor activity      | 21            |
| Molecular function | structural molecule activity                       | 52            |
| Molecular function | transporter activity                               | 206           |

**Table S4** Metabolic annotation of strain DDT-6 genome against Kyoto Encyclopedia of Genes and Genomes (KEGG) pathway database

| No.      | KEGG description                                    | Number |
|----------|-----------------------------------------------------|--------|
| map00010 | Glycolysis/Gluconeogenesis                          | 30     |
| map00020 | Citrate cycle (TCA cycle)                           | 22     |
| map00030 | Pentose phosphate pathway                           | 20     |
| map00040 | Pentose and glucuronate interconversions            | 9      |
| map00051 | Fructose and mannose metabolism                     | 19     |
| map00052 | Galactose metabolism                                | 10     |
| map00053 | Ascorbate and aldarate metabolism                   | 4      |
| map00061 | Fatty acid biosynthesis                             | 17     |
| map00071 | Fatty acid metabolism                               | 14     |
| map00072 | Synthesis and degradation of ketone bodies          | 6      |
| map00100 | Steroid biosynthesis                                | 1      |
| map00120 | Primary bile acid biosynthesis                      | 1      |
| map00121 | Secondary bile acid biosynthesis                    | 1      |
| map00130 | Ubiquinone and other terpenoid-quinone biosynthesis | 9      |
| map00190 | Oxidative phosphorylation                           | 47     |
| map00195 | Photosynthesis                                      | 8      |
| map00230 | Purine metabolism                                   | 61     |
| map00240 | Pyrimidine metabolism                               | 45     |
| map00250 | Alanine, aspartate and glutamate metabolism         | 23     |
| map00253 | Tetracycline biosynthesis                           | 3      |
| map00260 | Glycine, serine and threonine metabolism            | 26     |
| map00270 | Cysteine and methionine metabolism                  | 28     |
| map00280 | Valine, leucine and isoleucine degradation          | 23     |
| map00281 | Geraniol degradation                                | 8      |
| map00290 | Valine, leucine and isoleucine biosynthesis         | 20     |
| map00300 | Lysine biosynthesis                                 | 14     |
| map00310 | Lysine degradation                                  | 14     |
| map00311 | Penicillin and cephalosporin biosynthesis           | 5      |
| map00312 | beta-Lactam resistance                              | 4      |
| map00330 | Arginine and proline metabolism                     | 34     |
| map00340 | Histidine metabolism                                | 21     |
| map00350 | Tyrosine metabolism                                 | 20     |
| map00360 | Phenylalanine metabolism                            | 9      |
| map00361 | Chlorocyclohexane and chlorobenzene degradation     | 5      |
| map00362 | Benzoate degradation                                | 11     |
| map00363 | Bisphenol degradation                               | 8      |
| map00364 | Fluorobenzoate degradation                          | 2      |
| map00380 | Tryptophan metabolism                               | 17     |
| map00400 | Phenylalanine, tyrosine and tryptophan biosynthesis | 23     |



|          |                                             |    |
|----------|---------------------------------------------|----|
| map00401 | Novobiocin biosynthesis                     | 4  |
| map00410 | beta-Alanine metabolism                     | 7  |
| map00430 | Taurine and hypotaurine metabolism          | 2  |
| map00440 | Phosphonate and phosphinate metabolism      | 4  |
| map00450 | Selenocompound metabolism                   | 11 |
| map00460 | Cyanoamino acid metabolism                  | 9  |
| map00471 | D-Glutamine and D-glutamate metabolism      | 2  |
| map00473 | D-Alanine metabolism                        | 4  |
| map00480 | Glutathione metabolism                      | 25 |
| map00500 | Starch and sucrose metabolism               | 21 |
| map00510 | N-Glycan biosynthesis                       | 2  |
| map00511 | Other glycan degradation                    | 2  |
| map00520 | Amino sugar and nucleotide sugar metabolism | 31 |
| map00521 | Streptomycin biosynthesis                   | 9  |
| map00523 | Polyketide sugar unit biosynthesis          | 4  |
| map00524 | Butirosin and neomycin biosynthesis         | 3  |
| map00540 | Lipopolysaccharide biosynthesis             | 12 |
| map00550 | Peptidoglycan biosynthesis                  | 17 |
| map00561 | Glycerolipid metabolism                     | 9  |
| map00562 | Inositol phosphate metabolism               | 5  |
| map00564 | Glycerophospholipid metabolism              | 22 |
| map00565 | Ether lipid metabolism                      | 1  |
| map00590 | Arachidonic acid metabolism                 | 5  |
| map00591 | Linoleic acid metabolism                    | 6  |
| map00592 | alpha-Linolenic acid metabolism             | 2  |
| map00620 | Pyruvate metabolism                         | 39 |
| map00621 | Dioxin degradation                          | 1  |
| map00623 | Toluene degradation                         | 5  |
| map00624 | Polycyclic aromatic hydrocarbon degradation | 7  |
| map00625 | Chloroalkane and chloroalkene degradation   | 12 |
| map00626 | Naphthalene degradation                     | 13 |
| map00627 | Aminobenzoate degradation                   | 16 |
| map00630 | Glyoxylate and dicarboxylate metabolism     | 25 |
| map00633 | Nitrotoluene degradation                    | 2  |
| map00640 | Propanoate metabolism                       | 19 |
| map00642 | Ethylbenzene degradation                    | 5  |
| map00643 | Styrene degradation                         | 3  |
| map00650 | Butanoate metabolism                        | 28 |
| map00660 | C5-Branched dibasic acid metabolism         | 7  |
| map00670 | One carbon pool by folate                   | 16 |
| map00680 | Methane metabolism                          | 26 |
| map00710 | Carbon fixation in photosynthetic organisms | 11 |
| map00720 | Carbon fixation pathways in prokaryotes     | 25 |

|          |                                                         |    |
|----------|---------------------------------------------------------|----|
| map00730 | Thiamine metabolism                                     | 5  |
| map00740 | Riboflavin metabolism                                   | 10 |
| map00750 | Vitamin B6 metabolism                                   | 7  |
| map00760 | Nicotinate and nicotinamide metabolism                  | 16 |
| map00770 | Pantothenate and CoA biosynthesis                       | 15 |
| map00780 | Biotin metabolism                                       | 9  |
| map00785 | Lipoic acid metabolism                                  | 2  |
| map00790 | Folate biosynthesis                                     | 13 |
| map00791 | Atrazine degradation                                    | 1  |
| map00830 | Retinol metabolism                                      | 3  |
| map00860 | Porphyrin and chlorophyll metabolism                    | 15 |
| map00900 | Terpenoid backbone biosynthesis                         | 12 |
| map00903 | Limonene and pinene degradation                         | 12 |
| map00908 | Zeatin biosynthesis                                     | 1  |
| map00910 | Nitrogen metabolism                                     | 17 |
| map00920 | Sulfur metabolism                                       | 8  |
| map00930 | Caprolactam degradation                                 | 3  |
| map00940 | Phenylpropanoid biosynthesis                            | 5  |
| map00950 | Isoquinoline alkaloid biosynthesis                      | 1  |
| map00960 | Tropane, piperidine and pyridine alkaloid biosynthesis  | 4  |
| map00970 | Aminoacyl-tRNA biosynthesis                             | 25 |
| map00980 | Metabolism of xenobiotics by cytochrome P450            | 14 |
| map00982 | Drug metabolism - cytochrome P450                       | 14 |
| map00983 | Drug metabolism - other enzymes                         | 8  |
| map01040 | Biosynthesis of unsaturated fatty acids                 | 13 |
| map01051 | Biosynthesis of ansamycins                              | 1  |
| map01053 | Biosynthesis of siderophore group nonribosomal peptides | 7  |
| map01055 | Biosynthesis of vancomycin group antibiotics            | 1  |
| map02010 | ABC transporters                                        | 11 |
| map02020 | Two-component system                                    | 42 |
| map02030 | Bacterial chemotaxis                                    | 7  |
| map02040 | Flagellar assembly                                      | 1  |
| map02060 | Phosphotransferase system (PTS)                         | 5  |
| map03008 | Ribosome biogenesis in eukaryotes                       | 2  |
| map03013 | RNA transport                                           | 1  |
| map03018 | RNA degradation                                         | 12 |
| map03020 | RNA polymerase                                          | 4  |
| map03030 | DNA replication                                         | 14 |
| map03060 | Protein export                                          | 3  |
| map03320 | PPAR signaling pathway                                  | 4  |
| map03410 | Base excision repair                                    | 16 |
| map03420 | Nucleotide excision repair                              | 7  |
| map03430 | Mismatch repair                                         | 17 |

|          |                                           |    |
|----------|-------------------------------------------|----|
| map03440 | Homologous recombination                  | 15 |
| map04011 | MAPK signaling pathway - yeast            | 6  |
| map04070 | Phosphatidylinositol signaling system     | 5  |
| map04112 | Cell cycle - Caulobacter                  | 6  |
| map04113 | Meiosis - yeast                           | 1  |
| map04122 | Sulfur relay system                       | 4  |
| map04142 | Lysosome                                  | 2  |
| map04146 | Peroxisome                                | 10 |
| map04260 | Cardiac muscle contraction                | 3  |
| map04614 | Renin-angiotensin system                  | 1  |
| map04626 | Plant-pathogen interaction                | 1  |
| map04724 | Glutamatergic synapse                     | 2  |
| map04910 | Insulin signaling pathway                 | 1  |
| map04920 | Adipocytokine signaling pathway           | 1  |
| map04930 | Type II diabetes mellitus                 | 1  |
| map04974 | Protein digestion and absorption          | 1  |
| map05010 | Alzheimer's disease                       | 5  |
| map05012 | Parkinson's disease                       | 3  |
| map05014 | Amyotrophic lateral sclerosis (ALS)       | 3  |
| map05016 | Huntington's disease                      | 8  |
| map05020 | Prion diseases                            | 2  |
| map05133 | Pertussis                                 | 2  |
| map05142 | Chagas disease (American trypanosomiasis) | 2  |
| map05143 | African trypanosomiasis                   | 1  |
| map05146 | Amoebiasis                                | 1  |
| map05150 | Staphylococcus aureus infection           | 1  |
| map05152 | Tuberculosis                              | 1  |
| map05211 | Renal cell carcinoma                      | 1  |
| map05340 | Primary immunodeficiency                  | 1  |
| map05410 | Hypertrophic cardiomyopathy (HCM)         | 1  |

**Table S5** Information on the assembled contigs from clean dataset by SOAPdenovo

| <b>Scaffold No.</b> | <b>Number</b> | <b>Length (bp)</b> | <b>GC content</b> |
|---------------------|---------------|--------------------|-------------------|
| Scaffold1           | 1             | 236154             | 66.47%            |
| Scaffold2           | 1             | 204983             | 66.66%            |
| Scaffold3           | 1             | 180975             | 67.34%            |
| Scaffold4           | 1             | 173132             | 64.57%            |
| Scaffold5           | 1             | 161570             | 67.53%            |
| Scaffold6           | 1             | 151904             | 66.76%            |
| Scaffold7           | 1             | 139431             | 65.93%            |
| Scaffold8           | 1             | 128156             | 66.68%            |
| Scaffold9           | 1             | 127164             | 66.51%            |
| Scaffold10          | 1             | 125000             | 67.14%            |
| Scaffold11          | 1             | 114231             | 62.78%            |
| Scaffold12          | 1             | 111642             | 68.05%            |
| Scaffold13          | 1             | 105178             | 66.67%            |
| Scaffold14          | 1             | 94470              | 65.40%            |
| Scaffold15          | 1             | 87475              | 67.07%            |
| Scaffold16          | 1             | 84278              | 66.81%            |
| Scaffold17          | 1             | 80532              | 66.77%            |
| Scaffold18          | 1             | 79442              | 67.64%            |
| Scaffold19          | 1             | 78162              | 68.15%            |
| Scaffold20          | 1             | 76871              | 61.09%            |
| Scaffold21          | 1             | 67002              | 67.38%            |
| Scaffold22          | 1             | 65275              | 67.08%            |
| Scaffold23          | 1             | 64187              | 67.24%            |
| Scaffold24          | 1             | 62687              | 67.16%            |
| Scaffold25          | 1             | 57491              | 67.01%            |
| Scaffold26          | 1             | 54888              | 64.09%            |
| Scaffold27          | 1             | 54550              | 67.32%            |
| Scaffold28          | 1             | 54394              | 67.26%            |
| Scaffold29          | 1             | 53271              | 67.01%            |
| Scaffold30          | 1             | 53266              | 65.57%            |
| Scaffold31          | 1             | 53165              | 68.17%            |
| Scaffold32          | 1             | 51986              | 66.20%            |
| Scaffold33          | 1             | 51608              | 66.38%            |
| Scaffold34          | 1             | 50290              | 66.93%            |
| Scaffold35          | 1             | 49599              | 66.36%            |
| Scaffold36          | 1             | 48191              | 65.98%            |
| Scaffold37          | 1             | 46771              | 67.43%            |
| Scaffold38          | 1             | 46636              | 66.30%            |
| Scaffold39          | 1             | 44950              | 67.41%            |
| Scaffold40          | 1             | 43301              | 64.62%            |
| Scaffold41          | 1             | 39070              | 67.53%            |

|            |   |       |        |
|------------|---|-------|--------|
| Scaffold42 | 1 | 37313 | 67.41% |
| Scaffold43 | 1 | 37308 | 66.94% |
| Scaffold44 | 1 | 35123 | 66.43% |
| Scaffold45 | 1 | 34954 | 67.69% |
| Scaffold46 | 1 | 34107 | 66.89% |
| Scaffold47 | 1 | 33543 | 66.60% |
| Scaffold48 | 1 | 33370 | 67.19% |
| Scaffold49 | 1 | 33154 | 66.05% |
| Scaffold50 | 1 | 33122 | 66.35% |
| Scaffold51 | 1 | 31936 | 66.99% |
| Scaffold52 | 1 | 31246 | 67.09% |
| Scaffold53 | 1 | 29834 | 67.11% |
| Scaffold54 | 1 | 29764 | 67.61% |
| Scaffold55 | 1 | 29309 | 67.90% |
| Scaffold56 | 1 | 27979 | 64.39% |
| Scaffold57 | 1 | 23952 | 67.20% |
| Scaffold58 | 1 | 22718 | 65.19% |
| Scaffold59 | 1 | 20945 | 66.72% |
| Scaffold60 | 1 | 18807 | 68.09% |
| Scaffold61 | 1 | 17418 | 68.13% |
| Scaffold62 | 1 | 17125 | 68.99% |
| Scaffold63 | 1 | 16941 | 59.47% |
| Scaffold64 | 1 | 16547 | 63.49% |
| Scaffold65 | 1 | 16088 | 67.88% |
| Scaffold66 | 1 | 15574 | 66.70% |
| Scaffold67 | 1 | 14109 | 68.17% |
| Scaffold68 | 1 | 13246 | 66.23% |
| Scaffold69 | 1 | 13194 | 65.36% |
| Scaffold70 | 1 | 13172 | 61.49% |
| Scaffold71 | 1 | 11817 | 68.82% |
| Scaffold72 | 1 | 11517 | 59.89% |
| Scaffold73 | 1 | 11426 | 68.93% |
| Scaffold74 | 1 | 11033 | 68.34% |
| Scaffold75 | 1 | 10210 | 67.77% |
| Scaffold76 | 1 | 9248  | 67.58% |
| Scaffold77 | 1 | 8799  | 69.20% |
| Scaffold78 | 1 | 8790  | 68.78% |
| Scaffold79 | 1 | 8168  | 67.64% |
| Scaffold80 | 1 | 7537  | 57.77% |
| Scaffold81 | 1 | 5712  | 66.84% |
| Scaffold82 | 1 | 5692  | 66.69% |
| Scaffold83 | 1 | 4799  | 68.26% |
| Scaffold84 | 1 | 2430  | 53.05% |

|            |   |      |        |
|------------|---|------|--------|
| Scaffold85 | 1 | 2264 | 54.24% |
| Scaffold86 | 1 | 1773 | 57.08% |
| Scaffold87 | 1 | 1522 | 58.41% |
| Scaffold88 | 1 | 1170 | 64.62% |
| Scaffold89 | 1 | 768  | 55.08% |
| Scaffold90 | 1 | 697  | 54.95% |
| Scaffold91 | 1 | 685  | 60.44% |
| Scaffold92 | 1 | 603  | 67.33% |
| Scaffold93 | 1 | 580  | 61.03% |
| Scaffold94 | 1 | 555  | 53.15% |
| Scaffold95 | 1 | 523  | 60.61% |
| Scaffold96 | 1 | 515  | 56.12% |
| Scaffold97 | 1 | 510  | 61.37% |

**Table S6** DDGs-like genes found in strain DDT-1 genome using BLASTx

| Query ID           | Scaffold 1        | Scaffold 2        | Scaffold 3      | Scaffold 9      | Scaffold 10     | Scaffold 17       | Scaffold 18             | Scaffold 31     | Scaffold 52       |
|--------------------|-------------------|-------------------|-----------------|-----------------|-----------------|-------------------|-------------------------|-----------------|-------------------|
| Subject id         | CBW76073.1        | CBW75398.1        | CAQ47690.1      | CAQ43870.1      | CBW76470.1      | CBW76142.1        | CAQ43814.1              | CAQ43710.1      | CBW76219.1        |
| Identity (%)       | 90.52             | 95.20             | 99.62           | 88.87           | 81.00           | 92.75             | 98.31                   | 97.72           | 97.32             |
| Alignment length   | 462               | 504               | 264             | 265             | 579             | 218               | 296                     | 219             | 328               |
| Mismatches         | 3                 | 3                 | 1               | 3               | 11              | 9                 | 5                       | 5               | 4                 |
| Gap openings       | 0                 | 0                 | 0               | 0               | 0               | 0                 | 0                       | 0               | 0                 |
| Query start        | 122407            | 27132             | 166404          | 122710          | 40748           | 19490             | 9018                    | 45845           | 11948             |
| Query end          | 123780            | 25627             | 165613          | 121916          | 39012           | 20131             | 8131                    | 45189           | 10965             |
| Subject start      | 1                 | 1                 | 1               | 1               | 1               | 11                | 1                       | 1               | 114               |
| Subject end        | 460               | 504               | 264             | 265             | 571             | 222               | 296                     | 219             | 441               |
| E-value            | 2e-156            | 0                 | 2e-148          | 9e-125          | 0               | 9e-51             | 9e-168                  | 7e-119          | 2e-99             |
| Bit score          | 551               | 696               | 524             | 445             | 932             | 198               | 587                     | 424             | 359               |
| Metabolite pathway | DDNU<br>↓<br>DDOH | DDNU<br>↓<br>DDOH | DDA<br>↓<br>DDM | DDT<br>↓<br>DDE | DDT<br>↓<br>DDD | OHCTT<br>↓<br>CDP | DDMU<br>↓<br>DDOH       | DDA<br>↓<br>DDM | OHCTT<br>↓<br>CDP |
| DDGs gene          | <i>hdt</i>        | <i>hdt</i>        | <i>dcl</i>      | <i>dhc</i>      | <i>rdh</i>      | <i>hdl</i>        | <i>sds</i> , <i>dhg</i> | <i>dcl</i>      | <i>hdl</i>        |

DDD: 1,1-dichloro-2,2-bis(p-chlorophenyl)ethane; DDE: 2,2-bis(p-chlorophenyl)-1,1-dichlorethylene;

DDMU: 1-chloro-2,2-bis(4'-chlorophenyl)ethylene; DDOH: 2,2-bis(4'-chlorophenyl)ethanol;

DDNU: unsym-bis(4'-chlorophenyl)ethylene; CDP: 2-(4'-chlorophenyl)-3,3-dichloropropenoate;

DDA: bis(4'-chlorophenyl)acetate; DDM: bis(4'-chlorophenyl)methane;

OHCTT: 6-Oxo-2-hydroxy-7-(4'-chlorophenyl)-3,8,8-trichloroocta-2E,4E,7E-trienoate.

**Table S7** Molecular weight and characteristic peak of DDT and its metabolites

| <b>Compound</b> | <b>Molecular weight</b> | <b>Characteristic peak</b> |
|-----------------|-------------------------|----------------------------|
| DDT             | 354.5                   | 235, 165                   |
| DDD             | 320                     | 235, 165                   |
| DDE             | 318                     | 246, 176                   |
| DDMS            | 266                     | 212, 176                   |
| DDOH            | 266                     | 235, 165                   |
| DDA             | 282                     | 235, 165                   |



**Table S8** Composition of DDT degradation genes (DDGs) database

| No. | Gene        | Degradation pathway | Enzyme                                                       | Protein number |
|-----|-------------|---------------------|--------------------------------------------------------------|----------------|
| 1   | <i>dhc</i>  | DDT→DDE             | dehydrochlorinase                                            | 10             |
| 2   | <i>rrat</i> | DDE→DDMU            | ribonucleotide reductase<br>activating transmembrane protein | 2              |
| 3   | <i>sds</i>  | DDMU→DDMS           | reductase                                                    | 25             |
| 4   | <i>cpo</i>  | dhdDDT→dhDDT        | coproporphyrinogen III oxidase                               | 45             |
| 5   | <i>doa</i>  | DDT→dhdDDT          | 2,3-dioxygenase                                              | 35             |
| 6   | <i>dcl</i>  | DDA→DDM             | decarboxylase                                                | 253            |
| 7   | <i>ort</i>  | dhDDT→OHCTD         | oxidoreductase                                               | 83             |
| 8   | <i>ort</i>  | DDCCE→OHCTT         | oxidoreductase                                               | 83             |
| 9   | <i>hdl</i>  | OHCTT→CDP           | hydrolase                                                    | 168            |
| 10  | <i>ods</i>  | CBA→CB              | oxidase                                                      | 1              |
| 11  | <i>rdh</i>  | DDT→DDD             | reductive dehalogenase                                       | 2              |
| 12  | <i>dhc</i>  | DDD→DDMU            | dehydrochlorinase                                            | 10             |
| 13  | <i>dhg</i>  | DDMS→DDOH           | dehalogenase                                                 | 45             |
| 14  | <i>dhc</i>  | DDMS→DDNU           | dehydrochlorinase                                            | 10             |
| 15  | <i>hdt</i>  | DDNU→DDOH           | hydratase                                                    | 210            |

DDT: 1,1,1-trichloro-2,2-bis(p-chlorophenyl)ethane;  
DDD: 1,1-dichloro-2,2-bis(p-chlorophenyl)ethane;  
DDE: 2,2-bis(p-chlorophenyl)-1,1-dichlorethylene;  
DDMU: 1-chloro-2,2-bis(4'-chlorophenyl)ethylene;  
DDMS: 1-chloro-2,2-bis(4'-chlorophenyl)ethane;  
DDOH: 2,2-bis(4'-chlorophenyl)ethanol;  
DDNU: unsym-bis(4'-chlorophenyl)ethylene;  
CB: 4-chlorobenzoate;  
CBA: 4-chlorobenzaldehyde;  
CDP: 2-(4'-chlorophenyl)-3,3-dichloropropenoate;  
DDA: bis(4'-chlorophenyl)acetate;  
DDM: bis(4'-chlorophenyl)methane;  
dhdDDT: cis-2,3-dihydrodiol-DDT;  
dhDDT: 2,3-dihydroxy-DDT;  
OHCTT: 6-Oxo-2-hydroxy-7-(4'-chlorophenyl)-3,8,8-trichloroocta-2E,4E,7E-trienoate;  
OHCTD: 6-Oxo-2-hydroxy-7-(4'-chlorophenyl)-3,8,8-tetrachloroocta-2E,4E-dienoate;  
DDCCE: 1,1-dichloro-2-(dihydroxy-4'-chlorophenyl)-2-(4'-chlorophenyl)ethylene.
